# Supplementary material
Source: ML conference proceedings conference paper supplement (https://aclanthology.org/W19-8643)
Supplement: Supplementary_Attachment [file W19-8643.Supplementary_Attachment.xlsx]

## Sheet: Sheet1
Title	Task	Authors	Conference	Uses Automated Metrics	What kind of Automated Metrics	Uses Intrinsic (Human) Evaluation	What kind of Intrinsic (Human) Evaluation	Scale	Questions per criterium	Number of participants	Uses Extrinsic (Human) Evaluation	What kind of Extrinsic (Human) Evaluation	Number of examples	Examples per participant	Details about design (order, groups)	IAA	Statistics?	Hypotheses
Deep Graph Convolutional Encoders for Structured Data to Text Generation	Data-to-text generation	Marcheggiani & Perez-Beltrachini	INLG 2018	Yes	BLEU, METEOR, TER	No	-	-	-	-	No	-	-
Describing a Knowledge Base	Data-to-text generation	Wang et al.	INLG 2018	Yes	BLEU, METEOR, ROUGE	No	-	-	-	-	No	-	-
Syntactic Manipulation for Generating More Diverse and Interesting Texts	AMR generation	Deriu & Cieliebak	INLG 2018	Yes	BLEU, ROUGE-L, METEOR, NIST, CIDEr	Yes	Quality (i.e. grammatical correctness, fluency and correctness of content), naturalness (likelihood that content written by human)	Likert: 1-5 for quality; 1-3 for naturalness	Not specified	Not specified	No	-	250	250	No		Means, Student’s t-test with p < 0.05
Automated learning of templates for data-to-text generation: comparing rule-based, statistical and neural methods	Data-to-text generation	Van der Lee et al.	INLG 2018	Yes	BLEU	Yes	Fluency, clarity, correctness	Likert: 1-7	Fluency: 2; Clarity: 1; Correctness: 2	24 participants (no demographical data)	No	-	96	96	No	Krippendorff’s α = 0.39; Weighted κ = 0.07	Means, SD, The results were then analyzed using a repeated measures analysis of variance to investigate the effects of the corpus, techniques and methods on text perceptions of fluency, clarity and correctness. Post hoc effects were subsequently measured with a simple effects analysis using the Least Significant Difference test	Trainable approaches could be more robust on smaller datasets and datasets with high variety in language
End-to-End Content and Plan Selection for Data-to-Text Generation	Data-to-text generation	Gehrmann et al.	INLG 2018	Yes	BLEU, NIST, METEOR, ROUGE, CIDEr	No	-	-	-	-	No	-	-					Since dot attention does not require additional parameters, we hypothesize that it performs well in a limited data environment
SimpleNLG-ZH: a Linguistic Realisation Engine for Mandarin	Linguistic realisation	Chen et al.	INLG 2018	Yes	Unit tests, corpus-based (see if output is identical to input)	Yes	Fluent, do the sentences have the same meaning as their input (meaning preservation)	Categorical judgments (are sentences fluent; do they cover the same meaning) and qualitative error analysis	Not specified	Two native speakers	No	-	100	100	No	κ = 0.77	Percentages
Adapting SimpleNLG to Galician language	Linguistic realisation	Cascallar-Fuentes et al.	INLG 2018	Yes	Unit tests (see if output is identical to input)	No	-	-	-	-	No	-	-
Going Dutch: Creating SimpleNLG-NL	Linguistic realisation	De Jong & Theune	INLG 2018	Yes	Unit tests (see if output is identical to input)	Yes	No change in meaning compared to target sentence (meaning preservation)	Categorical (correct or not)	Not specified	Not specified	No	-	86	Not specified	No	No	Percentages
Learning to Flip the Bias of News Headlines	Style transfer	Chen et al.	INLG 2018	No	-	Yes	Do you understand the sentence, do both sentence report on the same event, do both sentences have opposite bias	Yes, partially, no, not sure	Not specified	Three "experts in journalism editing"	No	-	100	100	No	Fleiss’κ values were 0.97 (Q1), 0.97 (Q2), 0.62 (Q3), and 0.30 (Q4)	Frequencies	Accordingly, we approach the bias flipping task with a data-driven approach, addressing the following research questions: (1) How to acquire and sample a reasonable number of biased texts? (2) What kind of bias exists, and how is it manifested in the acquired texts? (3) Given biased texts and a mechanism to understand their bias, how far can we get using the current state-of-art text generation m…
Stylistically User-specific Response Generation	Response generation	Fikri et al.	INLG 2018	No	-	Yes	Fluency, relevance, style	Three-point Likert (bad, enough, good)	Not specified	Not specified. Each utterence evaluated by 10 judges.	No	-	100	Not specified	No	No	Raw score percentages
Explainable Autonomy: A Study of Explanation Styles for Building Clear Mental Models	Explanation generation (data-to-text)	Chiyah Garcia et al.	INLG 2018	No	-	Yes	User satisfaction, a worth it question	Likert: 1-7	User satisfaction: 4; "Worth it": 1; Mental-model: 2	21 participants (demographical data provided)	Yes	Task success (mental model)	3	3	No	No	Mean, median, mode, SD, post hoc Mann-Whitney-U tests following Kruskal-Wallis tests for non-parametric data	Null hypothesis: “there is no difference in the participant’s mental model scores between the conditions”
Content Aware Source Code Change Description Generation	Source code change description generation (data-to-text. They say translation/summarization)	Loyola et al.	INLG 2018	Yes	BLEU, METEOR, MEANT	Yes	Rate correlation between target and source (meaning preservation)	Likert: 1-5	Not specified	Not specified. 3 participants per sample	No	-	50	Not specified	No	No	Means	Our hypothesis is that, while both perspectives point at different semantic directions, there should be a certain degree of dependency
Improving Context Modelling in Multimodal Dialogue Generation	Response generation	Agarwal et al.	INLG 2018	Yes	BLEU, METEOR, ROUGE	No	-	-	-	-	No	-	-
Generating Market Comments Referring to External Resources	Data-to-text generation	Aoki et al.	INLG 2018	Yes	BLEU	Yes	Fluency, informativeness	Categorical (fluent, informative or not)	Not specified	One expert in finance	No	-	Not specified
Automatic Opinion Question Generation	Question generation	Chali & Baghaee	INLG 2018	Yes	BLEU, METEOR, ROUGE	Yes	Syntactic correctness, relevance	Likert: 1-5	Not specified	Three English-speaker students	No	-	100	100	No	No	Means
Modelling Pro-drop with the Rational Speech Acts Model	Referring expression generation	Chen et al.	INLG 2018	Yes	Accuracy	No	-	-	-	-	No	-	-					We hypothesise that the informativeness of a ZP depends on only a part of the preceding context
Self-Learning Architecture for Natural Language Generation	Template generation	Choi et al.	INLG 2018	Yes	BLEU	Yes	Grammatical correctness, informativeness	Ranking task. Rank the five models.	Not specified	21 human evaluators (no demographical data)	No	-	10	Not specified	No	No	Mean Rank
Towards making NLG a voice for interpretable Machine Learning	Data-to-text generation	Forrest et al.	INLG 2018	No	-	Yes	Ease of reading, understood the decision, trust the decision, understanding of the explanation	Likert: 1-5	1 question each	39 participants (demographical data given), between-subjects design but no 50/50 split.	No	-	2	1	NA	No	Mean, SD, Mann Whitney, Chi-square	The null hypothesis for this experiment is that ‘There is no difference between the groups receiving the NLG and non-NLG explanations’
Template-based multilingual football reports generation using Wikidata as a knowledge base	Data-to-text generation	Gatti et al.	INLG 2018	No	-	No	-	-	-	-	No	-	-
Poem Machine - a Co-creative NLG Web Application for Poem Writing	Poem/story/title generation	Hämäläinen	INLG 2018	No	-	No	-	-	-	-	No	-	-
Japanese Advertising Slogan Generator using Case Frame and Word Vector	Poem/story/title generation	Iwama & Kano	INLG 2018	No	-	No	-	-	-	-	Yes	They've submitted generated slogans to a slogan competition and compared how many of their slogans passed 1st reviews and were a finalist in the competition	-
Underspecified Universal Dependency Structures as Inputs for Multilingual Surface Realisation	Universal Dependency Structures generation	Mille et al.	INLG 2018	Yes	LAS (Labeled Attachment Scores)	No	-	-	-	-	No	-	-
LSTM Hypertagging	Hypertagging, linguistic realisation	Fu & White	INLG 2018	Yes	Accuracy	Yes	See if hypertagging leads to improvements in realisation quality. Adequacy and fluency.	Ranking: whether a or b was better.	Not specified	2 linguists who had no familiarity with the research.	No	-	100	100	No	No	Frequencies
Sequence-to-Sequence Models for Data-to-Text Natural Language Generation: Word- vs. Character-based Processing and Output Diversity	Data-to-text generation	Jagfeld et al.	INLG 2018	Yes	BLEU, ROUGE-L, output diversity: unique sentences and words, text entropy	Yes	Manual error analysis	-	-	One annotator (one of the authors)	No	-	195	195	No	No	Means, SD, percentages	While template-based systems can assure perfect content and linguistic quality, they often suffer from low diversity. Conversely, neural models might generalize beyond a limited amount of training texts or templates, thereby producing more diverse outputs.
Generating E-Commerce Product Titles and Predicting their Quality	Poem/story/title generation	De Souza et al.	INLG 2018	Yes	BLEU	Yes	copyright issues (e.g. brand, model spelling problems); encoding issues; offensive wording issues; required data not present in the title (e.g. brand, or important features for some products such as color, capacity, among others); irrelevant data present in the title (e.g. condition, shipping, or marketing information, price tags, duplicated words and synonyms, among others); syntax/grammar probl…	Not specified		Not specified ("several annotators")	No	-	9,823 products with 52,050 titles	Not specified	No	No		One hypothesis that emerges is that a good product title could be formed by tokens that occur most frequently across listings aggregated for the product, and that combining these frequent expressions could yield a good product title.
Designing and testing the messages produced by a virtual dietitian	Data-to-text generation	Anselma & Mazzei	INLG 2018	No	-	Yes	Usefulness, Persuasiveness, Boringness, Easiness	Likert: 1-5	1 for each criterium	20 participants (no demographical data)	No	-	2	2	NA	No		The main hypothesis that we tested was about the appealing of the violet version with respect to the blue version. In particular in the form we wanted to compare four specific properties of the messages, that are Usefulness, Persuasiveness Boringness, Easiness. These specific four questions are2 : QU: Usefulness perceived: The text messages in the blue version are more useful than the text messag…
Generation of Company descriptions using concept-to-text and text-to-text deep models: dataset collection and systems evaluation	Data-to-text generation and text-to-text generation	Qader et al.	INLG 2018	Yes	BLEU, ROUGE-L, METEOR, CIDEr	Yes	Information coverage, Non-redundancy, Semantic Adequacy, Grammatical Correctness (correctness)	Likert: 1-5	1 for each criterium	19 participants (no demographical data)	No	-	30	10	No	No
Automatically Generating Questions about Novel Metaphors in Literature	Question generation	Parde & Nielsen	INLG 2018	No	-	Yes	Naturalness, clarity, sensibility, depth	Likert: 1-5	1 for each criterium	Two workers	No	-	637	637	No	Krippendorff’s α=0.50, α=0.52, α=0.51, and α=0.52 for ratings of naturalness, clarity, sensibility, and depth, respectively
A Master-Apprentice Approach to Automatic Creation of Culturally Satirical Movie Titles	Poem/story/title generation	Alnajjar & Hämäläinen	INLG 2018	No	-	Yes	Qualitative analysis of how creativity is implemented in the system; quantitative: skill, imagination, appreciation	Likert: 1-5	Skill: 4; Imagination: 2; Appreciation 3	48 participants (no demographical data)	No	-	100	Not specified	Titles appeared random	No	Matthews correlation coefficient (no p-values)
Can Neural Generators for Dialogue Learn Sentence Planning and Discourse Structuring?	Response generation	Reed et al.	INLG 2018	Yes	Semantic accuracy and sentence planning accuracy	No	-	-		-	No	-	-
Neural Generation of Diverse Questions using Answer Focus, Contextual and Linguistic Features	Question generation	Harrison & Walker	INLG 2018	Yes	BLEU, METEOR, ROUGE	Yes	Grammaticality, correct information, answerability, and naturalness	Ranking task. Rank the different models	Nine questions total, not specified how much per criterium	Not specified	No	-	114	Not specified	No	No	Means
Findings of the E2E NLG Challenge	Shared task findings; rAMR generation	Dušek et al	INLG 2018	Yes	BLEU, NIST, METEOR, ROUGE, CIDEr	Yes	Naturalness, overall quality	Continuous scale (RankME)	Not specified	Not specified	No	-	We collected 4,239 5- way rankings for naturalness and 2,979 for quality, comparing 9.5 systems per MR on average	Not specified	No	No	Significance cluster computed using bootstrap resampling, TrueSkill value, range of ranks where the system falls in 95% of cases or more
Adapting Descriptions of People to the Point of View of a Moving Observer	Referring expression generation	Méndez et al.	INLG 2018	No	-	No	-	-		First evaluation: 27 participants (demographical data) Second evaluation: 27 (demographical data)	Yes	Finding the right object based on the description in a 3D virtual environment (task success)	-
Sentence Packaging in Text Generation from Semantic Graphs as a Community Detection Problem	Linguistic realisation	Shvets et al.	INLG 2018	Yes	Precision, recall, F1-score	No	-	-		-	No	-	-
Handling Rare Items in Data-to-Text Generation	Data-to-text generation	Shimorina & Gardent	INLG 2018	Yes	BLEU, NIST, METEOR, ROUGE-L, slot-error rate	Yes	Grammar, fluency, semantic adequacy of predicted texts	Categorical (correct or not)	1 for each criterium	1 judge	No	-	84	84	NA	NA	Percentages
Comprehension Driven Document Planning in Natural Language Generation Systems	Document planning	Thomson et al.	INLG 2018	No	-	Yes	The description is easy to read and understand, The description explains the suitability of the product for the task, The description is presented in a sensible order, Overall, this is a good description (overall quality)	Likert: 1-5	1 for each criterium	37 participants (no demographical data)	No	-	12	12	No	No	Means, ANOVA	Although this was exploratory research, the working hypothesis was that the ordering of the information would be evaluated as superior for the narrative descriptions, compared to list based descriptions.
Adapting Neural Single-Document Summarization Model for Abstractive Multi-Document Summarization: A Pilot Study	Summarization	Zhang et al.	INLG 2018	Yes	ROUGE, Edit distance	Yes	Coherence, Non-Redundancy, Readability	Likert: 1-5	Not specified	3 judges	No	-	20	Not specified	No	No	Means
Toward Bayesian Synchronous Tree Substitution Grammars for Sentence Planning	Document planning	Howcroft et al.	INLG 2018	No	-	Kinda?	Short qualitative impressions	-		-	No	-	-
Generating Summaries of Sets of Consumer Products: Learning from Experiments	Data-to-text	Kuptavanich et al.	INLG 2018	No	-	Yes	From the summaries above, which part do you think is most useful? (please quote), What would you like to see added to the summaries? Which part do you think is not necessary? When buying a TV which feature do you think is most important? What information do you think should be in a summary? What kind of summary would help you choose a good TV?	Ranking task and free text comments	1 for each criterium	18 participants (no demographical data)	No	-	New example every time	2	No	No	Ranking counts and mean rank	In this paper, we test the hypothesis that automatically generated textual summaries can be of benefit to customers. Hypotheses: Our research hypotheses were: [Hyp1]: Participants prefer the [alg2] summary over the baseline [amz] summary [Hyp2]: Participants prefer the [alg2] summary over the [alg1] summary
Neural sentence generation from formal semantics	AMR generation	Manome et al.	INLG 2018	Yes	BLEU, parsing and RTE	No	-	-		-	No	-	-
Cyclegen: Cyclic consistency based product review generator from attributes	Data-to-text generation	Sharma et al.	INLG 2018	Yes	BLEU, accuracy of polarity	Yes	We also perform some human evaluation of the polarity of the generated reviews against input polarity. The results for the same are shown in Table 3.	Not specified	Not specified	Not specified	No	-	Not specified	Not specified	No	No	Percentage accuracy
Neural Transition-based Syntactic Linearization	Linearization	Song et al.	INLG 2018	Yes	BLEU	No	-	-		-	No	-	-
Characterizing Variation in Crowd-Sourced Data for Training Neural Language Generators to Produce Stylistically Varied Outputs	AMR generation	Juraska & Walker	INLG 2018	Yes	Success rate/error rate	Kinda?	Identifying what proportion fo the generated utterances exhibit the desired discourse phenomenon (aggregation, contrast, fronting, subordination, existential clause, imperative and modal verb)	Not specified	Not specified	Not specified	No	-	Not specified	Not specified	No	No	Percentages
Char2char Generation with Reranking for the E2E NLG Challenge	AMR generation	Agarwal et al.	INLG 2018	Yes	BLEU	Yes	Quality, naturalness	TrueSkill	Not specified	Not specified	No	-	We collected 4,239 5- way rankings for naturalness and 2,979 for quality, comparing 9.5 systems per MR on average	Not specified	No	No	Significance cluster computed using bootstrap resampling, TrueSkill value, range of ranks where the system falls in 95% of cases or more
E2E NLG Challenge Submission: Towards Controllable Generation of Diverse Natural Language	AMR generation	Elder et al.	INLG 2018	Yes	BLEU, NIST, METEOR, ROUGE-L	Yes	Quality, naturalness	TrueSkill	Not specified	Not specified	No	-	We collected 4,239 5- way rankings for naturalness and 2,979 for quality, comparing 9.5 systems per MR on average	Not specified	No	No	Significance cluster computed using bootstrap resampling, TrueSkill value, range of ranks where the system falls in 95% of cases or more
E2E NLG Challenge: Neural Models vs. Templates	AMR generation	Puzikov & Gurevych	INLG 2018	Yes	BLEU, NIST, METEOR, ROUGE-L, CIDEr	Yes	Quality, naturalness	TrueSkill	Not specified	Not specified	No	-	We collected 4,239 5- way rankings for naturalness and 2,979 for quality, comparing 9.5 systems per MR on average	Not specified	No	No	Significance cluster computed using bootstrap resampling, TrueSkill value, range of ranks where the system falls in 95% of cases or more
The E2E NLG Challenge: A Tale of Two Systems	AMR generation	Smiley et al.	INLG 2018	Yes	BLEU, NIST, METEOR, ROUGE-L, CIDEr	Yes	Quality, naturalness	TrueSkill	Not specified	Not specified	No	-	We collected 4,239 5- way rankings for naturalness and 2,979 for quality, comparing 9.5 systems per MR on average	Not specified	No	No	Significance cluster computed using bootstrap resampling, TrueSkill value, range of ranks where the system falls in 95% of cases or more
Interactive health insight miner: an adaptive, semantic-based approach	Data-to-text generation	Funke et al.	INLG 2018	No	-	No	-	-		-	No	-	-
Multi-Language Surface Realisation as REST API based NLG Microservice	Linguistic realisation	Madsack et al.	INLG 2018	No	-	No	-	-		-	No	-	-
Statistical NLG for Generating the Content and Form of Referring Expressions	Referring expression generation	Li et al.	INLG 2018	Yes	Dice score, PRP (Perfect Recall Percentage), BLEU	No	-	-		-	No	-	-
Decoding Strategies for Neural Referring Expression Generation	Referring expression generation	Zarrieß & Schlangen	INLG 2018	Yes	BLEU, CIDEr, lenr (length ratio)	No	-	-		-	No	-	-					These results support our initial hypothesis that knowing when to terminate is an essential aspect of REG,
Knowledge Diffusion for Neural Dialogue Generation	Response generation	Liu et al.	ACL 2018	Yes	Accuracy, recall of factoid question answering dialogues	Yes	Fluency, appropriate of knowledge (appropriateness), entire correctness	Likert: 0-3	Not specified	Not specified	No	-	Not specified	Not specified	No	No	Means
Sequicity: Simplifying Task-oriented Dialogue Systems with Single Sequence-to-Sequence Architectures	Response generation	Lei et al.	ACL 2018	Yes	BLEU, Entity match rate, Success F1	No	-	-		-	No	-	-					copied words need to be specifically modeled
Exemplar Encoder-Decoder for Neural Conversation Generation	Response generation	Pandey et al.	ACL 2018	Yes	Activity, entity, tense, cmd, embedding metrics	No	-	-		-	No	-	-					We hypothesize that being able to refer to training responses for previously seen similar contexts could be a helpful signal to use while generating responses.
NeuralREG: An end-to-end approach to referring expression generation	Referring expression generation	Castro Ferreira et al.	ACL 2018	Yes	Accuracy, Levenshtein distance, pronoun accuracy, precision, recall, F1-score; BLEU	Yes	Fluency, grammaticality, clarity	Likert: 1-7	1 for each criterium	60 participants (with demographical data)	No	-	144	24	Latin-square design for 6 groups, no order information	No	Means, Post-hoc McNemar’s and Wilcoxon signed ranked tests adjusted by the Bonferroni method were used to test the statistical significance of the models in terms of accuracy and string edit distance, respectively.
A Graph-to-Sequence Model for AMR-to-Text Generation	AMR generation	Song et al.	ACL 2018	Yes	BLEU	No	-	-		-	No	-	-
Language Generation via DAG Transduction	Graph-to-text	Ye et al.	ACL 2018	Yes	BLEU, coverage score	No	-	-		-	No	-	-
Sentiment Adaptive End-to-End Dialog Systems	Dialogue generation	Shi & Yu	ACL 2018	Yes	Task success rate, dialogue lengths	No	-	-		-	No	-	-
Personalizing Dialogue Agents: I have a dog, do you have pets too?	Dialogue generation	Zhang et al.	ACL 2018	Yes	Log-likelihood of the correct sequence (perplexity); F1-score; Next utterance classification loss	Yes	Fluency, engagingness, consistency, persona detection (manipulation success)	Likert: 1-5	Not specified	Not specified	No	-	New example every time
Retrieve, Rerank and Rewrite: Soft Template Based Neural Summarization	Summarization	Cao et al.	ACL 2018	Yes	ROUGE, custom metrics (LEN_DIF, LESS_3, COPY, NEW_NE)	No	-	-		-	No	-	-
Towards Robust Neural Machine Translation	Translation	Cheng et al.	ACL 2018	Yes	BLEU	No	-	-		-	No	-	-
Fast Abstractive Summarization with Reinforce-Selected Sentence Rewriting	Summarization	Chen & Bansal	ACL 2018	Yes	ROUGE, METEOR	Yes	Relevance, readability	Ranking	Not specified	Not specified	No	-	100	Not specified	No	No	Frequencies
Style Transfer Through Back-Translation	Style transfer	Prabhumoye et al.	ACL 2018	Yes	BLEU, classification accuracy	Yes	Meaning preservation, fluency	Preference	Not specified	11 participants (no demographical data)	No	-	60	Not specified	No	No	Percentages	We hypothesize—relying on the study of Rabinovich et al. (2016) who showed that author characteristics are significantly obfuscated by both manual and automatic machine translation—that grounding in back-translation is a plausible approach to rephrase a sentence while reducing its stylistic properties. We hypothesize that a latent code z obtained through backtranslation will normalize the sentenc…
No Metrics Are Perfect: Adversarial Reward Learning for Visual Storytelling	(Visual) poem/story/title generation	Wang et al.	ACL 2018	Yes	BLEU, METEOR, ROUGH-L, CIDEr	Yes	Turing test (which one is human annotated) (manipulation success); relevance, expressiveness, concreteness	Preference, binary choice	Not specified	Not specified	No	-	150	Not specified	No	No	Percentages
Learning to Generate Move-by-Move Commentary for Chess Games from Large-Scale Social Forum Data	Data-to-text	Jhamtani et al.	ACL 2018	Yes	BLEU, Diversity	Yes	Is commentary correct, can the move be inferred, fluency	Binary choice, Likert: 1-5	1 for each criterium	2 annotators (no demographical data)	No	-	100	Not specified	No	Cohens κ (Cohen, 1968)) is 0.45 for Q1 and 0.32 for Q2	Percentages, means, SDs, bootstrap tests on 1000 subsets of size 50
Soft Layer-Specific Multi-Task Summarization with Entailment and Question Generation	Summarization	Guo et al.	ACL 2018	Yes	ROUGE, METEOR	Yes	Relevance, readability	Preference	Not specified	Not specified	No	-	Not specified
Hierarchical Neural Story Generation	Poem/story/title generation	Fan et al.	ACL 2018	Yes	Model perplexity, prompt ranking accuracy	Yes	Pairing stories to prompts, overal preference (overall quality)	Accuracy, preference		Not specified	No	-	105 stories per model
Efficient and Robust Question Answering from Minimal Context over Documents	Response generation	Min et al.	ACL 2018	Yes	Precision, accuracy, F1, Exact Match	No	-	-		-	No	-	-
Unsupervised Neural Machine Translation with Weight Sharing	Translation	Yang et al.	ACL 2018	Yes	BLEU	No	-	-		-	No	-	-
Unpaired Sentiment-to-Sentiment Translation: A Cycled Reinforcement Learning Approach	Style transfer	Xu et al.	ACL 2018	Yes	Accuracy, BLEU	Yes	Sentiment, semantic similarity	Likert: 1-10	Not specified	Not specified	No	-	200	Not specified	No	No	Means
Simple and Effective Text Simplification Using Semantic and Neural Methods	Text simplification	Sulem et al.	ACL 2018	Yes	BLEU, SARI, system conservatism	Yes	Grammaticality, meaning preservation, simplicity, structural simplicity	Likert: 1-5	1 for each criterium	3 native English annotators (no demographical data)	No	-	1960	1960	No	No	Means
Denoising Distantly Supervised Open-Domain Question Answering	Response generation	Lin et al.	ACL 2018	Yes	ExactMatch, F1	No	-	-		-	No	-	-
A Neural Approach to Pun Generation	Poem/story/title generation	Yu et al.	ACL 2018	Yes	Perplexity, Distinct	Yes	Readability, accuracy, fluency	Likert: 1-5	Not specified	Not specified	No	-	100	Not specified	No	No	Means
Learning to Control the Specificity in Neural Response Generation	Response generation	Zhang et al.	ACL 2018	Yes	Distinct, BLEU, average & extrema	Yes	The response is not only semantically relevant and grammatical, but also informative and interesting	Likert: 0-2	1 for each criterium	3 annotators (no demograhical data)	No	-	300	300	Randomly mixed order	Fleiss’κ values were 0.448, 0.471, 0.404, 0.418, 0.507, 0.451, 0.526 (per system)	Percentages
Unsupervised Discrete Sentence Representation Learning for Interpretable Neural Dialog Generation	Dialogue generation	Zhao et al.	ACL 2018	Yes	Perplexity, KL(q||p), the mutual information between input data and latent variables	Yes	Homogeneity of latent actions	Not specified	Not specified	Not specified	No	-	Not specified
Multi-Granularity Hierarchical Attention Fusion Networks for Reading Comprehension and Question Answering	Response generation	Wang et al.	ACL 2018	Yes	ExactMatch, F1	No	-	-		-	No	-	-
Generating Informative Responses with Controlled Sentence Function	Response generation	Ke et al.	ACL 2018	Yes	Perplexity, Distinct, accuracy	Yes	Grammaticality, appropriateness, informativeness	Not specified	1 for each criterium	Not specified	No	-	5400	Not specified	Separately evaluated!	Percentage agreement reported	Percentages that our model wins a baseline after removing tie pairs, Sign Test
Did the Model Understand the Question?	Response generation	Mudrakarta et al.	ACL 2018	Yes	Integrated Gradients	No	-	-		-	No	-	-
On the Automatic Generation of Medical Imaging Reports	Image captioning	Jing et al.	ACL 2018	Yes	BLEU, METEOR, ROUGE, CIDER	No	-	-		-	No	-	-
Mem2Seq: Effectively Incorporating Knowledge Bases into End-to-End Task-Oriented Dialog Systems	Dialogue generation	Madotto et al.	ACL 2018	Yes	Accuracy, BLEU, F1	No	-	-		-	No	-	-
Fighting Offensive Language on Social Media with Unsupervised Text Style Transfer	Style transfer	Nogueira dos Santos et al.	ACL 2018	Yes	Accuracy, content preservation, perplexity	No	-	-		-	No	-	-
Task-oriented Dialogue System for Automatic Diagnosis	Dialogue generation	Liu et al.	ACL 2018	Yes	Success rate, average reward, average number of turns; accuracy	No	-	-		-	No	-	-
Paper Abstract Writing through Editing Mechanism	Text extension	Wang et al.	ACL 2018	Yes	METEOR, ROUGE-L	Yes	Overall preference; turing tests	Preference; turing test	Not specified	10 NLP researchers (no demographical data)	No	-	50	Not specified	No	No	Percentages
Conditional Generators of Words Definitions	Text extension	Gadetsky et al.	ACL 2018	Yes	Perplexity, BLEU	No	-	-		-	No	-	-
Extreme Adaptation for Personalized Neural Machine Translation	Translation	Michel & Neubig	ACL 2018	Yes	BLEU, classification accuracy	No	-	-		-	No	-	-
Automatic Question Generation using Relative Pronouns and Adverbs	Question generation	Khullar et al.	ACL 2018	No	-	Yes	Syntactic correctness, semantic correctness, fluency, uniqueness	1-3 score (1-2 for fluency, 0-2 for uniqueness)	1 for each criterium	4 non-native but proficient English speakers (no demographical data)	No	-	300	Not specified	No	Cohens κ 0.6, 0.7, 0.7, 0.7	Means
Reinforced Extractive Summarization with Question-Focused Rewards	Summarization	Arumae & Liu	ACL 2018	Yes	F-scores	No	-	-		-	No	-	-
Exploring Chunk Based Templates for Generating a subset of English Text	Bag-of-words to text	Bhatnagar et al.	ACL 2018	No	-	No	-	-		-	No	-	-
Unsupervised Semantic Abstractive Summarization	Summarization	Dohare et al.	ACL 2018	Yes	Recall, precision, F1-score, ROUGE	No	-	-		-	No	-	-
